# Supplementary material
Source: MDPI journal article supplement (https://www.mdpi.com/2073-445X/13/5/624)
Supplement: s1 [file s1]

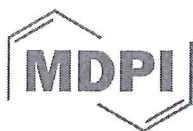

Multidisciplinary  
Digital Publishing  
Institute

MDPI AG  
St. Alban-Anlage 66  
CH-4052 Basel  
Switzerland

Tel. +41 61 683 77 34  
E-Mail [billing@mdpi.com](mailto:billing@mdpi.com)  
[www.mdpi.com](http://www.mdpi.com)

## 付款承诺函

亲爱的作者:

感谢您一直以来对 MDPI 的支持和信任。在您完成付款之前,为了确保您以下接收的文章能及时出版上线,您可以选择签署付款承诺函,该承诺函用以证明您承诺向 MDPI 支付以下文章处理费用(APC)。如果您已完成付款,则无须签署本函。

稿件 ID: land-2968359

文章标题: Decoupling analysis of resource curse, environmental regulation and resource industry transformation in post-development area: Evidence from Inner Mongolia

付款人姓名: 张红艳

身份证号码 (仅作为付款承诺声明身份确认, ※保密): 150430198601061888

联系人手机号: 15661012323

送达地址: 中国内蒙古自治区呼和浩特市回民区北二环185号, 010070

付款人所在机构: 内蒙古财经大学

您的文章处理费用(APC): (金额: 2600 CHF) 尚未支付, 您承诺上述费用会在截止日 2024 年 5 月 10 日之前一次性全额支付。如因不可抗力需逾期支付, 本公司接受一次延期申请, 请写邮件至 [billing-cn@mdpi.com](mailto:billing-cn@mdpi.com) 确认。如若未按约定日期付款, 本公司视为违约, 将保留追究法律责任的权利。您的任何其他投稿不再享有签署付款承诺函提前发表的权利, 直至您交清欠款。届时您将承担包括但不限于诉讼费、律师费、保全费等一切费用。

签署日期: 2024.5.3

中文手写签名: 张红艳  
手印/盖章:

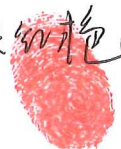

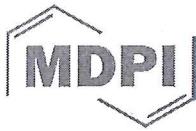

Multidisciplinary  
Digital Publishing  
Institute

MDPI AG  
St. Alban-Anlage 66  
CH-4052 Basel  
Switzerland

Tel. +41 61 683 77 34  
E-Mail [billing@mdpi.com](mailto:billing@mdpi.com)  
[www.mdpi.com](http://www.mdpi.com)

## Payment Commitment Letter

Dear Authors,

Thank you for your continued support and trust in MDPI. Before you complete your payment, in order to ensure that the publication of your manuscript is completed on time, you can choose to sign the below payment commitment letter. The letter certifies your commitment to pay the article processing charge (APC) to MDPI. If you have already paid the APC, you do not need to sign this letter.

Manuscript ID: land-2968359

Article Title: Decoupling analysis of resource curse, environmental regulation and resource industry transformation in post-development area: Evidence from Inner Mongolia

Payer Name: Hongyan Zhang

Identification Number (Please note, this is kept confidential and is only for identification purposes※):

Mobile Phone Number: 15661012323

Delivery Address: No. 185, North Second Ring Road, Huimin District, Hohhot, Inner Mongolia, 010070, PR China

Payer's Institution: Inner Mongolia University of Finance and Economics

The article processing charge (APC) for your article: (amount: 2600 CHF) has not yet been paid. However, the payment will be made in full before the following due date: May 10, 2024. In the case of force majeure (where your payment will become overdue) please email [billing-cn@mdpi.com](mailto:billing-cn@mdpi.com) to apply for a possible one-time extension. If the payment is not received by the agreed date, it will be considered a breach of contract, and MDPI reserves the right to pursue legal action. Your right to advanced publication by signing a Payment Commitment Letter for other submissions will be revoked until you have paid the amount owed. In the event of legal action, you will bear all expenses including but not limited to litigation fees, attorney fees, preservation fees, etc.

Sign Date: 2024.5.3

Signature in English:  
Fingerprint/Stamp:

Hongyan Zhang

## Author Information Commitment letter

Dear editors,

Thank you very much for your attention to our manuscript. Professor Liu Changxin, corresponding author of the original manuscript, cannot continue to be the corresponding author of this manuscript due to force majeure. After careful discussion, we have decided to add Professor Li Baojia from Institute of Geographic and Natural Resources Research, Chinese Academy of Sciences as the corresponding author of this manuscript.

We promise that this decision is endorsed by all authors and that all authors' signatures are attached at the end of the document.

Kind regards,

All authors

May 3, 2024

| Name          | Institution                                                                                                                | Sign                                                                                |
|---------------|----------------------------------------------------------------------------------------------------------------------------|-------------------------------------------------------------------------------------|
| Mingkai Liu   | School of Economics, Beijing Technology and Business University, Beijing 100048, China                                     | 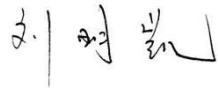 |
| Fujia Li      | Institute of Geographic and Natural Resources Research, Chinese Academy of Sciences, Beijing 100101, China                 |  |
| Hongyan Zhang | College of Resources and Environmental Economics, Inner Mongolia University of Finance and Economics, Hohhot 010070, China |  |
| Changxin Liu  | Institution of Science and Development, China Academy of Sciences, Beijing 100190, China                                   |  |
| Xiaoju Ggong  | School of Economics, Beijing Technology and Business University, Beijing 100048, China                                     |  |
